# Supplementary material for: Production of targeted aromatics by using Diels–Alder classes of reactions with furans and olefins over ZSM-5
Source: Royal Society of Chemistry journal article supplement (doi:10.1039/c2gc35767d), 2012-01-01
Supplement: c2gc35767d.pdf [file c2gc35767d.pdf]

## Support Information

### Catalytic conversion of furan in the continuous flow fixed-bed reactor

The catalytic reactions were carried out in a continuous flow fixed-bed quartz reactor of ½ in. O.D. ZSM-5 powders were held in the reactor by a quartz frit. The reactor temperature was measured using a K-type thermocouple inserted in an inner tube inserted in the reactor to the top of the catalyst bed. Prior to reactions, the catalyst was calcined as described above. After calcination, the reactor was purged by helium (Airgas, 99.999%) at 408 mL/min for 5 min and cooled down to reaction temperatures. The helium stream then was set to bypass the reactor. Furan and 2MF were introduced into the helium stream by a syringe pump (Fisher KDS100) and was also set to bypass the reactor for 30 min before switching the helium stream to go through the reactor. An air bath condenser was used to trap the heavy products. Gas phase products were collected by air bags. All runs were done at atmospheric pressure. No pressure drop was detected across the catalyst bed.

After reaction, the reactor was purged by helium at a flow rate of 408 mL/min for 45 s at the reaction temperature. The effluent was collected by an air bag. Again, heavy products were trapped in the air bath condenser. After reaction, the spent catalyst was regenerated in-situ at 600°C in a 60 mL/min flowing air. The CO formed during regeneration was converted to CO<sub>2</sub> by a copper catalyst (copper oxide, CuO, Sigma-Aldrich) working at 240°C. CO<sub>2</sub> was trapped by a CO<sub>2</sub> trap (Ascarite, Sigma-Aldrich). The coke yield was obtained by measuring the weight change of the CO<sub>2</sub> trap.

Furfural and FA were fed into the reactor by using a bubbler surrounded by a water bath at 45°C. The helium stream (408 mL/min) flowed through the bubbler and carried furfural or FA vapor into the reactor. The other operations were the same as furan or 2MF conversion.

For olefins co-feeding experiments, a 2% ethylene or a 2% propylene balanced by helium (Airgas) was co-fed into the reactor with different furans feedstocks. Different olefins/furans ratios were obtained by diluting the olefins by another helium stream.

### Products analysis

Gas phase products were identified by GC/MS (Shimadzu-2010) and quantified by GC/FID/TCD (Shimadzu-2014). Both GCs are equipped with a Restek Rtx-VMS column. This column cannot separate *p*- and *m*-xylenes. Xylene isomers were separated by using another GC/FID (Shimadzu-2010) equipped with HP-INNOWax column that is able to completely separate all xylene

isomers. The TCD was calibrated by a CO and CO<sub>2</sub> mixture balanced by helium (Airgas, 6% CO<sub>2</sub> and 14% CO). The FID was calibrated by a C<sub>2</sub> – C<sub>6</sub> normal olefins standard mixture (Scott Specialty Gas, 1000 ppm for each olefin); furan, benzene, and toluene (Sigma-Aldrich, 99+%, they can be vaporized in airbags filled with helium); prepared liquid standards including xylenes, ethylbenzene, styrene, benzofuran, indene, and naphthalene (Sigma-Aldrich, 99+%). The sensitivity of other compounds was assumed to be proportional to the number of carbon in similar olefins or aromatics (e.g. allene vs propylene, methylindene vs indene).

We also washed the condenser with ethanol and analysed the condensed carbons. In the entire study less than 0.05% of the carbon was obtained in the condenser. The majority of the products were in either the gas phase or coke deposited on the catalyst. Our carbon balance closed with >90% for all runs in this paper unless otherwise mentioned. The reaction time was 4.5 min except for the long time-on-stream reactions.

**Table S1.** Products distribution obtained from conversions of furan, olefins, and furan + olefins mixtures over ZSM-5.

| Feedstock                                    | Furan | Furan | Furan    | Furan     | Furan     | Furan     | Furan             | Non      | Non       | Non       |
|----------------------------------------------|-------|-------|----------|-----------|-----------|-----------|-------------------|----------|-----------|-----------|
| Carrier gas                                  | He    | He    | 1.92%    | 1.94%     | 2%        | 2%        | 2%                | 1.92%    | 1.94%     | 2%        |
|                                              |       |       | Ethylene | Propylene | Propylene | Propylene | Propylene         | Ethylene | Propylene | propylene |
| Temperature (°C)                             | 600   | 600   | 600      | 600       | 550       | 450       | 300               | 600      | 600       | 450       |
| Furan WHSV (h <sup>-1</sup> ) <sup>a</sup>   | 10.4  | 5.9   | 10.4     | 10.4      | 10.4      | 10.4      | 10.4              | 10.4     | 10.4      | 9.1       |
| Olefins WHSV (h <sup>-1</sup> ) <sup>a</sup> | –     | –     | 11.1     | 15.6      | 16.0      | 16.0      | 16.0              | 11.1     | 15.6      | 9.1       |
| P <sub>furan</sub> (torr)                    | 6.0   | 6.0   | 6.0      | 6.0       | 6.0       | 6.0       | 6.0               | 0.0      | 0.0       | 0.0       |
| Olefins/Furan mol. ratio                     | –     | –     | 2.6      | 2.4       | 2.5       | 2.5       | 2.5               | –        | –         | –         |
| <i>Furan conversion (%)</i>                  | 48    | 64    | 50       | 65        | 59        | 54        | 14                | –        | –         | –         |
| <i>Olefins conversion (%)</i>                | –     | –     | 1        | 16        | 25        | 22        | 2                 | 4        | 14        | 35        |
| <i>Carbon balance (%)</i>                    | 101   | 105   | 95       | 99        | 99        | 101       | 102               | 98       | 104       | 110       |
| <i>Overall selectivity (%)<sup>b</sup></i>   |       |       |          |           |           |           |                   |          |           |           |
| CO                                           | 13.9  | 14.1  | 15.0     | 7.5       | 4.4       | 2.8       | 0.3               | 0.0      | 0.0       | 0.0       |
| CO <sub>2</sub>                              | 1.1   | 1.8   | 1.7      | 1.5       | 0.8       | 0.2       | 0.0               | 0.0      | 0.0       | 0.0       |
| Olefins                                      | 19.1  | 16.9  | 17.0     | 29.0      | 22.7      | 29.4      | 31.0              | 20.2     | 69.3      | 86.9      |
| Aromatics                                    | 29.2  | 42.6  | 40.2     | 53.8      | 65.6      | 60.2      | 34.5              | 21.2     | 22.9      | 8.9       |
| Coke                                         | 33.8  | 23.0  | 23.9     | 7.4       | 5.5       | 5.4       | 19.0              | 58.6     | 7.7       | 4.1       |
| Oxygenates                                   | 2.9   | 1.6   | 2.1      | 0.7       | 1.1       | 2.0       | 15.3 <sup>c</sup> | 0.0      | 0.0       | 0.0       |
| <i>Aromatic selectivity (%)</i>              |       |       |          |           |           |           |                   |          |           |           |
| Benzene                                      | 27.5  | 24.3  | 28.4     | 15.3      | 8.4       | 5.1       | 1.9               | 31.8     | 35.9      | 9.6       |
| Toluene                                      | 25.1  | 21.8  | 30.1     | 58.6      | 53.7      | 38.9      | 20.9              | 13.4     | 32.7      | 35.1      |
| Xylenes                                      | 4.6   | 3.9   | 7.9      | 13.6      | 18.3      | 35.1      | 47.1              | 3.5      | 14.8      | 43.5      |
| Styrene                                      | 8.7   | 5.0   | 7.1      | 5.4       | 4.3       | 0.8       | 0.0               | 5.2      | 1.8       | 0.0       |
| Indene                                       | 14.2  | 15.3  | 9.9      | 2.6       | 3.6       | 2.0       | 1.6               | 22.0     | 5.4       | 0.0       |
| Naphthalene                                  | 7.4   | 15.2  | 3.8      | 0.6       | 1.6       | 0.6       | 0.6               | 8.5      | 2.6       | 0.0       |
| Alkylbenzenes <sup>d</sup>                   | 1.3   | 0.5   | 2.1      | 1.8       | 4.2       | 10.3      | 19.7              | 0.7      | 0.9       | 11.8      |
| Methylstyrene                                | 1.1   | 0.9   | 2.5      | 0.5       | 0.8       | 0.3       | 0.0               | 0.6      | 0.4       | 0.0       |
| Indane                                       | 1.7   | 1.6   | 2.6      | 0.7       | 2.3       | 3.6       | 3.9               | 2.9      | 0.7       | 0.0       |
| Methylindene                                 | 4.7   | 7.5   | 3.3      | 0.6       | 2.5       | 2.3       | 2.9               | 6.9      | 3.7       | 0.0       |
| Dihydronaphthalene                           | 0.6   | 1.0   | 0.1      | 0.0       | 0.0       | 0.1       | 0.0               | 0.3      | 0.0       | 0.0       |
| Methylnaphthalene                            | 3.2   | 2.9   | 2.2      | 0.2       | 0.5       | 1.1       | 1.3               | 4.1      | 1.1       | 0.0       |
| <i>Olefin selectivity (%)</i>                |       |       |          |           |           |           |                   |          |           |           |
| Ethylene                                     | 38.7  | 41.7  | –        | 56.4      | 47.1      | 29.5      | 10.3              | –        | 53.8      | 29.2      |
| Propylene                                    | 35.1  | 35.6  | 59.1     | –         | –         | –         | –                 | 24.4     | –         | –         |
| C <sub>4</sub> olefins                       | 4.3   | 4.6   | 10.4     | 32.3      | 39.6      | 48.2      | 58.9              | 71.9     | 44.8      | 55.9      |
| Allene                                       | 4.6   | 4.3   | 4.5      | 0.7       | 0.1       | 0.0       | 0.0               | 0.6      | 0.7       | 0.0       |
| C <sub>5</sub> olefins                       | 14.2  | 11.3  | 19.2     | 7.1       | 5.2       | 7.1       | 17.4              | 3.0      | 0.7       | 8.9       |
| C <sub>6</sub> olefins                       | 3.1   | 2.5   | 6.8      | 3.6       | 6.1       | 11.6      | 12.0              | 0.0      | 0.1       | 4.8       |
| C <sub>7</sub> olefins                       | 0.0   | 0.0   | 0.0      | 0.0       | 1.9       | 3.6       | 1.5               | 0.0      | 0.0       | 1.2       |
| <i>Xylenes distribution (%)</i>              |       |       |          |           |           |           |                   |          |           |           |
| p-Xylene                                     | NA    | 36    | NA       | NA        | NA        | NA        | NA                | NA       | NA        | 37        |
| m-Xylene                                     | NA    | 47    | NA       | NA        | NA        | NA        | NA                | NA       | NA        | 47        |
| o-Xylene                                     | NA    | 17    | NA       | NA        | NA        | NA        | NA                | NA       | NA        | 16        |

<sup>a</sup> Weight hourly space velocity (WHSV) is defined as flow rate of furan, ethylene, or propylene (g/h) divided by weight of the catalyst (g).

<sup>b</sup> For conversion of mixtures, ethylene or propylene are excluded.

<sup>c</sup> Oxygenates includes 86% C<sub>7</sub> oxygenates formed directly by addition of furan and propylene. In the other runs most oxygenates are benzofuran (>50%).

<sup>d</sup> Alkylbenzenes includes ethylbenzene, 1,2,4-trimethylbenzene, 4-ethyltoluene, and propylbenzene.

**Table S2.** Products distribution obtained from conversion of 2MF (2-methylfuran) and 2MF + propylene mixtures over ZSM-5.

| Feedstock                                      | 2MF  | 2MF          | 2MF          | 2MF          | 2MF          | 2MF          | 2MF          |
|------------------------------------------------|------|--------------|--------------|--------------|--------------|--------------|--------------|
| Carrier gas                                    | He   | 2% propylene |
| Temperature (°C)                               | 600  | 600          | 450          | 300          | 200          | 450          | 450          |
| 2MF WHSV (h <sup>-1</sup> ) <sup>a</sup>       | 5.7  | 5.7          | 5.7          | 5.7          | 5.7          | 5.7          | 5.7          |
| Propylene WHSV (h <sup>-1</sup> ) <sup>a</sup> | –    | 9.1          | 9.1          | 9.1          | 9.1          | 2.9          | 1.0          |
| P <sub>2MF</sub> (torr)                        | 4.9  | 4.9          | 4.9          | 4.9          | 4.9          | 4.9          | 4.9          |
| Olefins/2MF molar ratio                        | –    | 3.09         | 3.09         | 3.09         | 3.09         | 1.00         | 0.35         |
| 2MF conversion (%)                             | 98   | 99           | 92           | 13           | 0            | 86           | 79           |
| Propylene conversion (%)                       | –    | 31           | 42           | 20           | 14           | 43           | 35           |
| Carbon Balance (%)                             | 103  | 99           | 98           | 98           | 97           | 94           | 85           |
| <i>Overall selectivity (%)<sup>b</sup></i>     |      |              |              |              |              |              |              |
| CO                                             | 11.0 | 5.9          | 1.2          | 0.0          | 0.0          | 3.0          | 4.8          |
| CO <sub>2</sub>                                | 0.5  | 0.1          | 0.2          | 0.0          | 0.0          | 0.8          | 1.5          |
| Olefins                                        | 23.3 | 27.8         | 27.5         | 23.5         | 14.4         | 11.7         | 8.9          |
| Aromatics                                      | 47.3 | 59.6         | 66.1         | 51.7         | 20.6         | 71.1         | 60.4         |
| Coke                                           | 16.6 | 6.2          | 5.0          | 24.8         | 65.0         | 12.1         | 21.6         |
| Oxygenates <sup>c</sup>                        | 1.4  | 0.4          | 0.0          | 0.0          | 0.0          | 1.3          | 2.8          |
| <i>Aromatic selectivity (%)</i>                |      |              |              |              |              |              |              |
| Benzene                                        | 23.8 | 24.4         | 6.8          | 0.9          | 1.8          | 6.9          | 7.4          |
| Toluene                                        | 24.5 | 28.6         | 17.5         | 9.2          | 5.1          | 17.1         | 17.3         |
| Xylenes                                        | 9.2  | 26.9         | 48.9         | 51.3         | 35.7         | 46.5         | 35.7         |
| Styrene                                        | 2.8  | 1.5          | 0.4          | 0.0          | 0.5          | 0.9          | 1.8          |
| Indene                                         | 11.0 | 4.0          | 1.9          | 0.5          | 5.9          | 2.4          | 5.3          |
| Naphthalene                                    | 7.2  | 2.4          | 0.7          | 0.6          | 10.7         | 0.9          | 1.1          |
| Alkylbenzenes <sup>d</sup>                     | 2.2  | 4.0          | 18.2         | 34.2         | 34.4         | 16.4         | 15.1         |
| Methylstyrene                                  | 2.0  | 1.1          | 0.4          | 0.0          | 0.0          | 1.3          | 2.3          |
| Indane                                         | 4.5  | 2.9          | 3.3          | 2.4          | 5.0          | 5.0          | 9.4          |
| Methylindene                                   | 9.9  | 3.4          | 1.6          | 0.5          | 0.0          | 2.0          | 4.0          |
| Dihydronaphthalene                             | 0.5  | 0.1          | 0.0          | 0.0          | 0.0          | 0.0          | 0.0          |
| Methylnaphthalene                              | 2.4  | 0.6          | 0.3          | 0.4          | 1.0          | 0.7          | 0.6          |
| <i>Olefin selectivity (%)</i>                  |      |              |              |              |              |              |              |
| Ethylene                                       | 28.7 | 61.6         | 30.4         | 9.1          | 0.0          | 47.1         | 56.7         |
| Propylene                                      | 35.0 | –            | –            | –            | –            | –            | –            |
| C <sub>4</sub> olefins                         | 15.6 | 28.0         | 49.3         | 61.2         | 61.9         | 40.3         | 30.1         |
| Allene                                         | 0.3  | 0.1          | 0.0          | 0.0          | 0.0          | 0.0          | 0.0          |
| C <sub>5</sub> olefins                         | 17.4 | 7.3          | 8.0          | 20.2         | 18.3         | 5.7          | 5.2          |
| C <sub>6</sub> olefins                         | 3.0  | 3.0          | 8.6          | 9.5          | 19.9         | 5.2          | 6.7          |
| C <sub>7</sub> olefins                         | 0.0  | 0.0          | 3.7          | 0.0          | 0.0          | 1.7          | 1.3          |
| <i>Xylenes distribution (%)</i>                |      |              |              |              |              |              |              |
| <i>p</i> -Xylene                               | 36   | 32           | 43           | 54           | NA           | 41           | 43           |
| <i>m</i> -Xylene                               | 46   | 49           | 42           | 37           | NA           | 45           | 43           |
| <i>o</i> -Xylene                               | 17   | 19           | 14           | 9            | NA           | 14           | 13           |

<sup>a</sup> Weight hourly space velocity (WHSV) is defined as flow rate of 2MF or propylene (g/h) divided by weight of the catalyst (g).

<sup>b</sup> For conversion of mixtures, ethylene or propylene are excluded.

<sup>c</sup> Oxygenates contain furan and furylthylene.

<sup>d</sup> Alkylbenzenes includes ethylbenzene, 1,2,4-trimethylbenzene, 4-ethyltoluene, and propylbenzene.

**Table S3.** Products distribution obtained from conversion of furfural, furfural + propylene mixtures, FA (furfuryl alcohol), and FA + propylene mixtures over ZSM-5.

| Feedstock                                                     | Furfural | Furfural     | Furfural     | FA   | FA           |
|---------------------------------------------------------------|----------|--------------|--------------|------|--------------|
| Carrier gas                                                   | He       | 2% propylene | 2% propylene | He   | 2% propylene |
| Temperature (°C)                                              | 600      | 600          | 450          | 600  | 600          |
| Furans WHSV (h <sup>-1</sup> ) <sup>9</sup>                   | 9.0      | 9.0          | 9.0          | 3.3  | 3.3          |
| Propylene WHSV (h <sup>-1</sup> ) <sup>a</sup>                | –        | 9.1          | 9.1          | 9.1  | 9.1          |
| P <sub>furfural</sub> or P <sub>FA</sub> (torr) <sup>10</sup> | 7.0      | 7.0          | 7.0          | 2.5  | 2.5          |
| Olefins/Furfural or FA molar ratio                            | –        | 2.15         | 2.15         | –    | 6.43         |
| <i>Furfural and FA conversion (%)</i>                         | 100      | 100          | 100          | 100  | 100          |
| <i>Propylene conversion (%)</i>                               | –        | 53           | 64           | –    | 29           |
| <i>Carbon Balance (%)</i>                                     | 31       | 79           | 75           | 26   | 79           |
| <i>Overall selectivity (%)<sup>11</sup></i>                   |          |              |              |      |              |
| CO                                                            | 29.3     | 11.3         | 7.3          | 13.0 | 2.0          |
| CO <sub>2</sub>                                               | 3.3      | 1.9          | 0.1          | 1.5  | 0.0          |
| Olefins                                                       | 18.8     | 38.7         | 46.6         | 14.7 | 58.5         |
| Aromatics                                                     | 16.7     | 42.7         | 38.6         | 42.4 | 34.4         |
| Coke                                                          | 16.6     | 3.4          | 2.9          | 25.8 | 4.8          |
| Oxygenates <sup>12</sup>                                      | 15.2     | 2.0          | 4.5          | 2.6  | 0.3          |
| <i>Aromatic selectivity (%)</i>                               |          |              |              |      |              |
| Benzene                                                       | 35.5     | 21.0         | 6.1          | 9.1  | 23.4         |
| Toluene                                                       | 28.6     | 57.9         | 38.5         | 13.1 | 38.2         |
| Xylene                                                        | 6.9      | 14.2         | 38.5         | 13.3 | 21.7         |
| Styrene                                                       | 6.3      | 1.9          | 0.5          | 7.4  | 3.1          |
| Indene                                                        | 8.2      | 1.5          | 1.0          | 17.8 | 2.9          |
| Naphthalene                                                   | 8.1      | 1.2          | 0.6          | 12.5 | 3.1          |
| Alkylbenzenes <sup>13</sup>                                   | 0.6      | 1.0          | 10.2         | 4.4  | 3.3          |
| Methylstyrene                                                 | 0.6      | 0.2          | 0.1          | 2.2  | 0.4          |
| Indane                                                        | 0.6      | 0.3          | 2.9          | 5.6  | 1.5          |
| Methylindene                                                  | 2.5      | 0.5          | 1.4          | 10.0 | 1.8          |
| Dihydronaphthalene                                            | 0.4      | 0.0          | 0.0          | 0.4  | 0.0          |
| Methylnaphthalene                                             | 1.8      | 0.4          | 0.3          | 4.2  | 0.6          |
| <i>Olefin selectivity (%)</i>                                 |          |              |              |      |              |
| Ethylene                                                      | 38.1     | 58.3         | 28.6         | 43.5 | 55.8         |
| Propylene                                                     | 42.8     | –            | –            | 36.1 | –            |
| C <sub>4</sub> olefins                                        | 8.2      | 35.6         | 55.4         | 12.5 | 40.9         |
| Allene                                                        | 4.5      | 0.0          | 0.0          | 3.2  | 0.0          |
| C <sub>5</sub> olefins                                        | 5.8      | 5.1          | 7.9          | 4.7  | 2.4          |
| C <sub>6</sub> olefins                                        | 0.62     | 1.0          | 6.0          | 0.0  | 0.9          |
| C <sub>7</sub> olefins                                        | 0.0      | 0.0          | 2.07         | 0.0  | 0.0          |
| <i>Xylenes distribution (%)</i>                               |          |              |              |      |              |
| <i>p</i> -Xylene                                              | 37       | 32           | 40           | 40   | 31           |
| <i>m</i> -Xylene                                              | 46       | 51           | 46           | 43   | 49           |
| <i>o</i> -Xylene                                              | 17       | 18           | 14           | 17   | 20           |

<sup>9</sup> Weight hourly space velocity (WHSV) is defined as flow rate of furfural or propylene (g/h) divided by weight of the catalyst (g). The amount of furfural was estimated by Antoine Equation at 45°C.

<sup>10</sup> The vapor pressure of furfural was estimated by Antoine Equation at 45°C.

<sup>11</sup> For conversion of mixtures, ethylene or propylene are excluded.

<sup>12</sup> Oxygenates contain 97 – 99% furan and 1 – 3% 2MF

<sup>13</sup> Alkylbenzenes includes ethylbenzene, 1,2,4-trimethylbenzene, 4-ethyltoluene, and propylbenzene.
